# Supplementary material for: Measuring mobility in older hospital patients with cognitive impairment using the de Morton Mobility Index
Source: Springer Nature journal article supplement (doi:10.1186/s12877-018-0780-9), 2018-04-23
Supplement: MOESM4 [file 15713890]

**Additional file 4: Histogram of the de Morton Mobility Index**

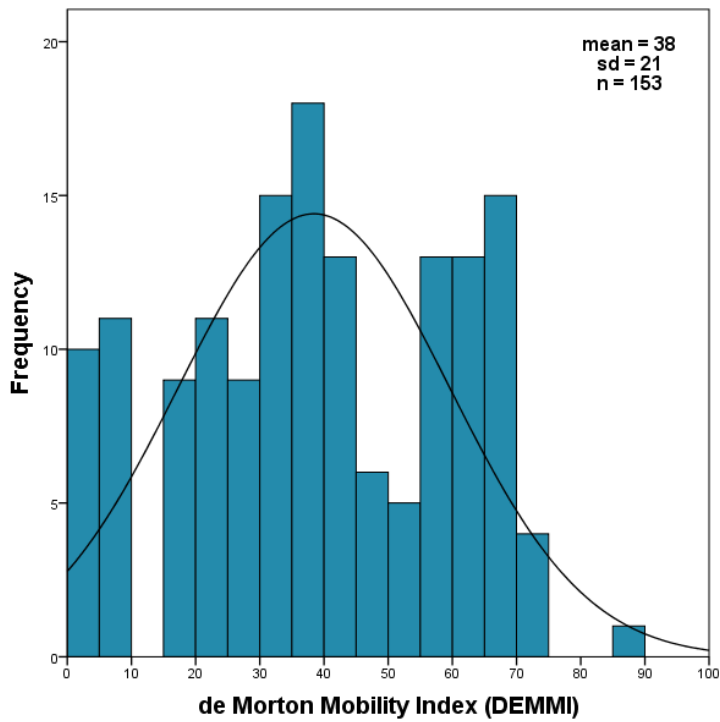

*Histogram of the de Morton Mobility Index scores (range: 0 - 100 points) of all study participants (153 geriatric patients with cognitive impairment)*
