# Supplementary material for: Measuring mobility in older hospital patients with cognitive impairment using the de Morton Mobility Index
Source: Springer Nature journal article supplement (doi:10.1186/s12877-018-0780-9), 2018-04-23
Supplement: MOESM5 [file 15713890]

## Additional file 5: DEMMI mean scores and DEMMI mean administration times for sub-groups of cognitive impairment

| DEMMI mean scores and DEMMI mean administration times for sub-groups of cognitive impairment |                |               |                                              |                                                           |
|----------------------------------------------------------------------------------------------|----------------|---------------|----------------------------------------------|-----------------------------------------------------------|
|                                                                                              |                |               | DEMMI points,<br>mean score $\pm$ SD (range) | DEMMI administration time,<br>mean score $\pm$ SD (range) |
| Full sample                                                                                  |                |               | 38 $\pm$ 21 (0 – 85)                         | 5.2 $\pm$ 2.0 (1 – 10)                                    |
| Mini Mental State Examination sub-groups                                                     |                |               |                                              |                                                           |
| Quantile                                                                                     | Range          | Frequency (%) |                                              |                                                           |
| First                                                                                        | 0 – 16 points  | 42 (27)       | 35 $\pm$ 22 (0-67)                           | 5.0 $\pm$ 2.3 (1 – 9)                                     |
| Second                                                                                       | 17 – 20 points | 39 (25)       | 36 $\pm$ 21 (0 – 74)                         | 5.2 $\pm$ 2.2 (2 – 10)                                    |
| Third                                                                                        | 21 – 22 points | 35 (23)       | 40 $\pm$ 20 (8 – 85)                         | 5.1 $\pm$ 1.7 (2 – 9)                                     |
| Forth                                                                                        | 23 – 24 points | 37 (24)       | 44 $\pm$ 22 (0 – 74)                         | 5.3 $\pm$ 1.9 (2 – 9)                                     |
|                                                                                              |                |               | Chi <sup>2</sup> =3.67; p=0.30               | Chi <sup>2</sup> =0.70; p=0.87                            |
| Abbreviations: DEMMI = de Morton Mobility Index; SD = standard deviation                     |                |               |                                              |                                                           |
